# Supplementary material for: Assembly of two new polyoxometalate-templated supramolecular compounds by utilizing a ligand with a combination of rigidness and flexibility
Source: Royal Society of Chemistry journal article supplement (doi:10.1039/b817653a), 2009-01-01
Supplement: b817653a.pdf [file b817653a.pdf]

## Assembly of Two New Polyoxometalate-Templated Supramolecular Compounds by Utilizing a Ligand with Combination of Rigidity and Flexibility

Peng-Peng Zhang, Jun Peng, \* Jing-Quan Sha, Ai-Xiang Tian, Hai-Jun Pang, Yuan  
Chen, Min Zhu

Key Laboratory of Polyoxometalate Science of Ministry of Education, Faculty of  
Chemistry, Northeast Normal University, Changchun, Jilin, 130024, P. R. China

**Table 1.** Selected bond length (ranges) (Å) and bond angles (deg) for compounds **1**  
and **2**

| Compound 1        |                      |           |            |
|-------------------|----------------------|-----------|------------|
| P—O               | 1.465(18)–1.595(16)  | Cu1-N2    | 1.864(13)  |
| W—O <sub>a</sub>  | 2.422(17)–2.473(19)  | Cu2-N5    | 1.864(13)  |
| W—O <sub>b</sub>  | 1.859(13)–1.927(11)  | N7-Cu1-N2 | 176.2(6)   |
| W—O <sub>t</sub>  | 1.634(10)–1.680(9)   | N5-Cu2-N5 | 180.000(6) |
| Cu1-N7            | 1.892(14)            |           |            |
| Compound 2        |                      |           |            |
| P—O               | 1.465(8) to 1.574(8) | Cu2-N5    | 1.855(6)   |
| Mo—O <sub>a</sub> | 2.397(9)–2.507(8)    | Cu2-N8    | 1.874(7)   |
| Mo—O <sub>b</sub> | 1.871(6)–1.928(6)    | N4-Cu1-N4 | 180.000(2) |
| Mo—O <sub>t</sub> | 1.639(5)–1.664(5)    | N5-Cu2-N8 | 174.5(3)   |
| Cu1-N4            | 1.873(7)             |           |            |

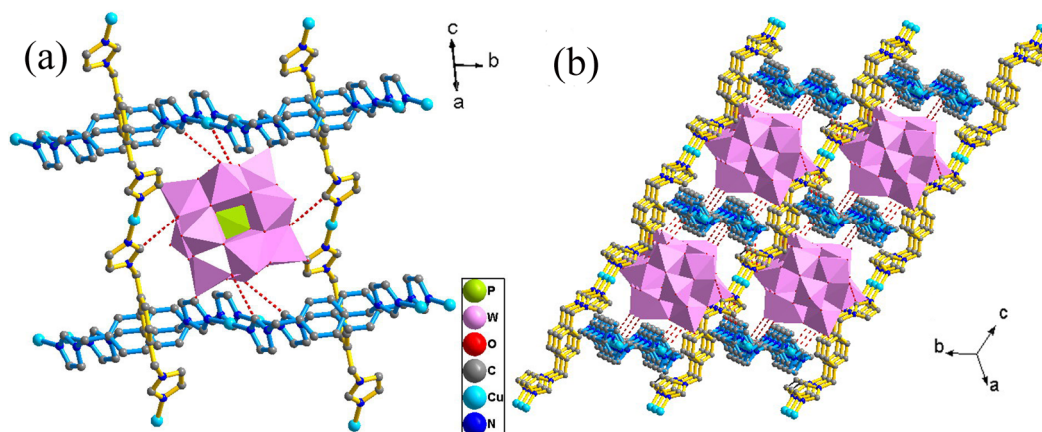

**Fig. S1.** (a) The hydrogen bonding around the polyanion and (b) in the 3D supramolecular framework of compound **1**. The hydrogen atoms are omitted for clarity. (The hydrogen bonding are shown in red dashed.)

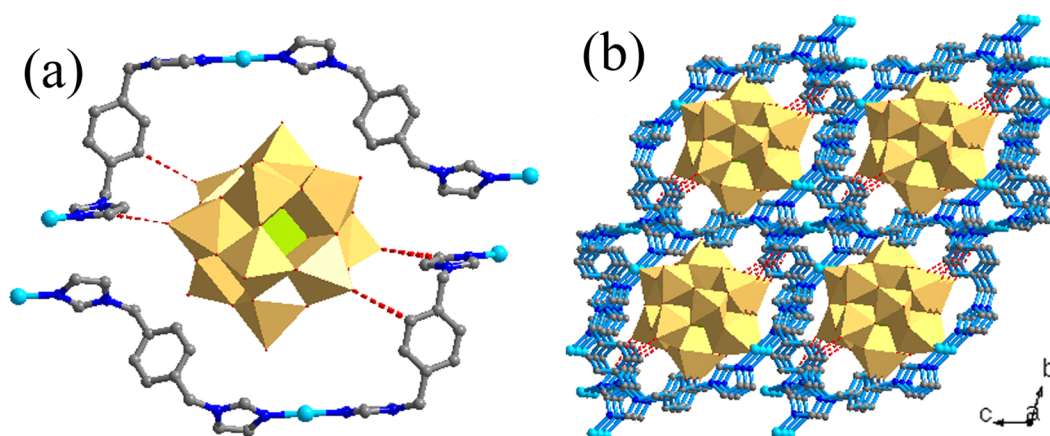

**Fig. S2.** (a) The hydrogen bonding around the polyanion and (b) in the 3D supramolecular framework of compound **2**. The hydrogen atoms are omitted for clarity. (The hydrogen bonding are shown in red dashed.)

**Table 2.** Hydrogen-bonding parameters in compounds **1** and **2**

| Compounds | D-H...A                  | d(D-H) | d(H...A) | d(D...A)  | <(DHA) |
|-----------|--------------------------|--------|----------|-----------|--------|
| <b>1</b>  | C(1)-H(1A)...O(9) (i)    | 0.93   | 2.40     | 3.165(18) | 138.9  |
|           | C(6)-H(6A)...O(14) (ii)  | 0.93   | 2.41     | 3.32(2)   | 165.4  |
|           | C(9)-H(9A)...O(3) (iii)  | 0.93   | 2.51     | 3.31(2)   | 143.6  |
|           | C(18)-H(18A)...O(15)(iv) | 0.93   | 2.57     | 3.28(2)   | 133.1  |

|          |                          |      |      |           |       |
|----------|--------------------------|------|------|-----------|-------|
|          | C(22)-H(22A)...O(10)(iv) | 0.93 | 2.38 | 3.13(2)   | 138.3 |
|          | C(23)-H(23A)...O(2) (i)  | 0.93 | 2.33 | 2.92(2)   | 120.5 |
|          | C(24)-H(24A)...O(3) (v)  | 0.93 | 2.20 | 3.01(2)   | 144.9 |
| <b>2</b> | C7-H7A...O16 (i)         | 0.93 | 2.59 | 3.201(10) | 124.1 |
|          | C16-H16A...O18 (i)       | 0.93 | 2.54 | 3.358(12) | 146.4 |

Symmetry transformations used to generate equivalent atoms:

Compound 1: (i)  $x,y,z+1$ ; (ii)  $-x+2,-y+2,-z$ ; (iii)  $-x+1,-y+2,-z$ ; (iv)  $-x+2,-y+2,-z+1$ ;

(v)  $x+1,y,z+2$

Compound 2: (i)  $x-1,y,z$

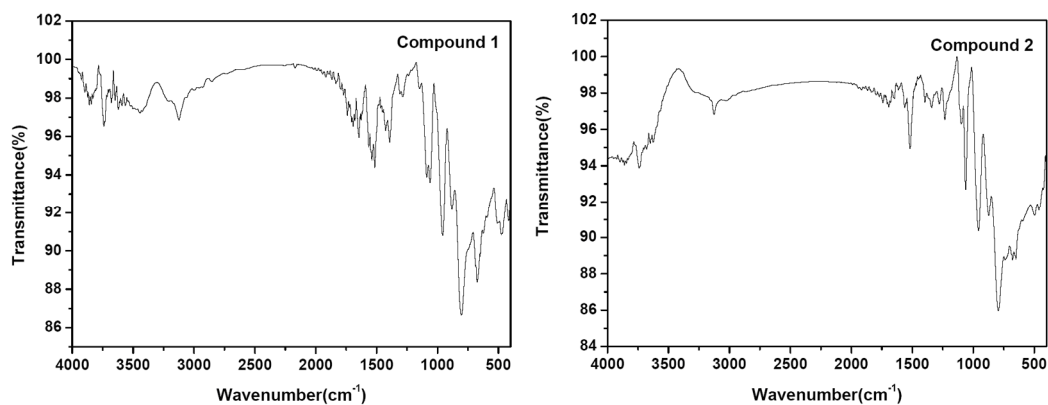

**Fig. S3.** IR spectra for compounds **1** and **2**.

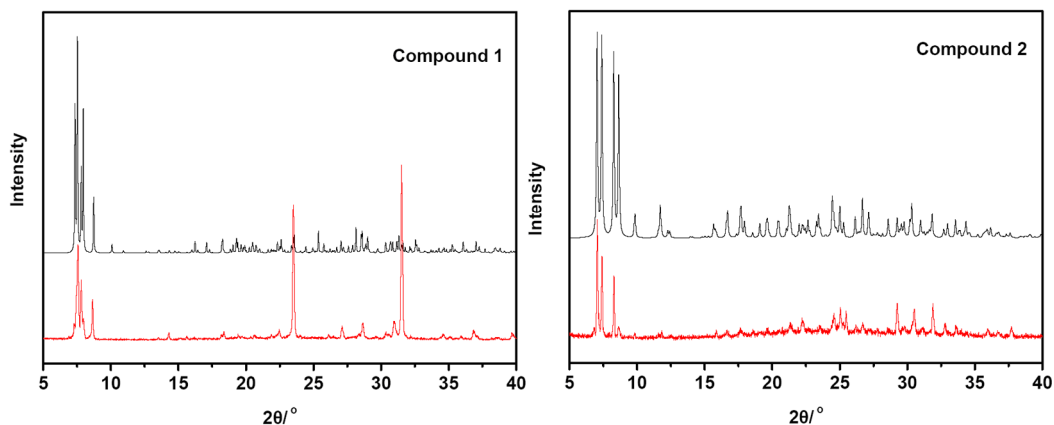

**Fig. S4.** The simulative (black line) and experimental (red line) powder X-ray diffraction patterns for compounds **1** and **2**.

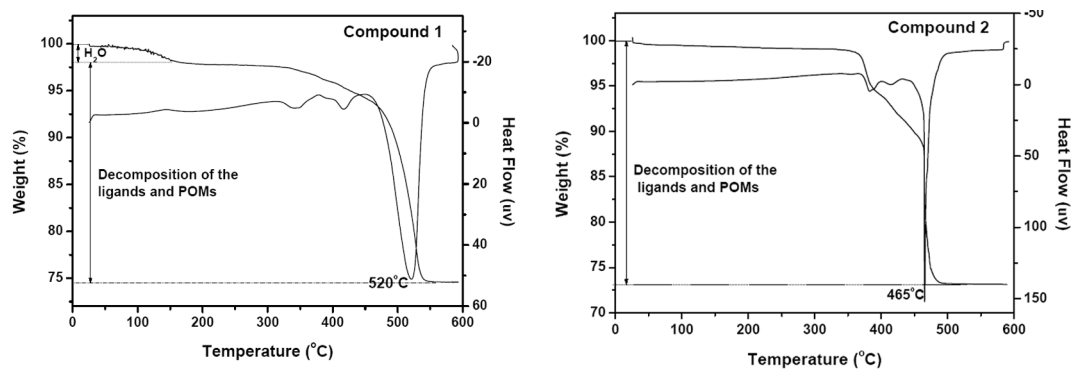

Fig. S5. TG and DTA curves of compounds 1 and 2.

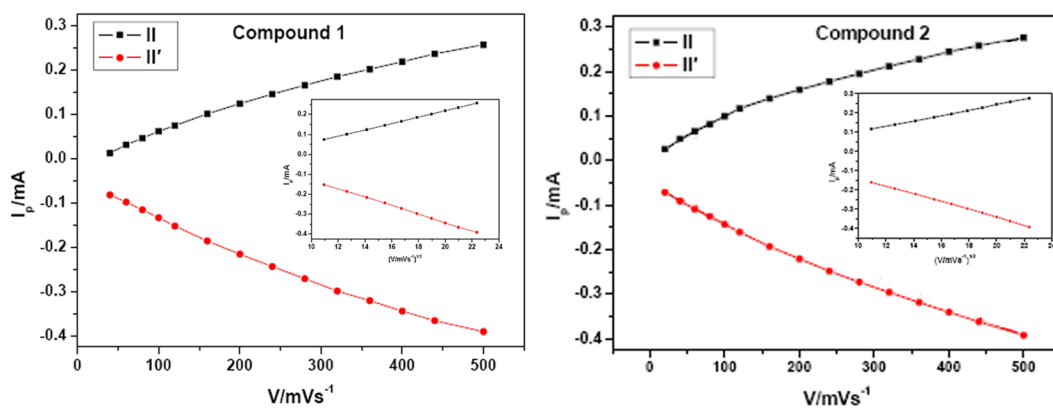

Fig. S6. The dependence of anodic peak (II) and cathodic peak (II') currents on scan rates for compound 1 and 2. The insets show the peak currents are proportional to the square root of the scan rates higher than 120 mV·s<sup>-1</sup>.
